# Supplementary material for: Clinical success of guided tissue regeneration for treating vertical bone and furcation defects in dogs
Source: Frontiers journal article supplement (doi:10.3389/fvets.2023.1247347), 2023-08-30
Supplement: Table_1.pdf [file Table_1.pdf]

**Supplemental Table 1: Publications of GTR in dogs, including case reports, case series, and a prospective study.** Clinical success was documented in all instances, providing proof-of-concept.

| Publication                                                                                  | Tooth/Teeth                                                                                                                                                                 | Pre-operative degree of periodontal disease                                                                                                                                    | Bone graft material                                                                                                                | Barrier membrane | Post-operative awake recheck at 10-14 days                                                              | Post-operative anesthetized recheck at 6-8 months                                                                                                                                                                                                                                  |
|----------------------------------------------------------------------------------------------|-----------------------------------------------------------------------------------------------------------------------------------------------------------------------------|--------------------------------------------------------------------------------------------------------------------------------------------------------------------------------|------------------------------------------------------------------------------------------------------------------------------------|------------------|---------------------------------------------------------------------------------------------------------|------------------------------------------------------------------------------------------------------------------------------------------------------------------------------------------------------------------------------------------------------------------------------------|
| Smith, 1995<br><br>Case report (10 year-old German Shepherd dog)                             | -Chronic periodontal defect secondary to a string foreign body in the interproximal space of left mandibular fourth premolar and first molar involving soft tissue and bone | -4mm gingival recession with a 6mm periodontal pocket for 10mm of total attachment loss<br>-Radiographs revealed periodontal bone loss                                         | Autogenous corticocancellous bone harvested from the left ventral mandible                                                         | None             | -No post-operative complications reported by the veterinarian owner, but not rechecked by the clinician | -4mm gingival pocket<br>-Partial restoration of periodontal bone with a persistent 4-5mm bone defect resulting in approximately 60% diminution in the size of the original boney defect                                                                                            |
| Beckman, 2004<br><br>Case report (7 year-old female spayed American Eskimo dog)              | -Right mandibular first molar                                                                                                                                               | -6mm periodontal pocket on the distal aspect<br>-Vertical 2-walled osseous defect on the distal aspect of the distal root with a 2-mm decrease in alveolar crestal bone height | Consil                                                                                                                             | None             | -Complete healing of the surgical site                                                                  | -3mm periodontal pocket on the distal aspect<br>-Bone deposition on the distal aspect with a 1mm infrabony defect measured radiographically<br>-Restoration of the periodontal space                                                                                               |
| Rice, Snyder, and Soukup, 2012<br><br>Case report (11 year-old male castrated Cairn Terrier) | -Left mandibular first molar (mesial aspect of the mesial root)                                                                                                             | -12mm periodontal pocket along mesial root<br>-Approximately 50% vertical bone loss associated with only the mesial root<br>-2-walled infrabony defect of the mesial root      | Autogenous cortical bone harvested from the vestibular cortical plate ventral to the alveolar bone of right mandibular first molar | Doxirobe         | -Recommend to be performed by referring veterinarian due to travel distance - no further remarks        | -2mm gingival recession with 2mm attached gingiva, for 2mm total attachment loss<br>-Radiographically appropriate alveolar crestal bone height with osteointegration of graft<br>-Radiographically apparent PDL space traceable along the entire length of the mesial root surface |
| Stepanuik & Gingerich, 2015                                                                  | -Right maxillary fourth premolar (x1)                                                                                                                                       | -The mean periodontal probing depth was 7.2- mm (range 5 to 12-                                                                                                                | Periomix                                                                                                                           | Ossiflex         | -No membrane exposure, evidence of surgical site infection,                                             | -All periodontal probing depths decreased to < 3-mm, with a mean                                                                                                                                                                                                                   |

|                                                                                           |                                                                                                     |                                                                                                                 |          |          |                                                                |                                                                                                                                                                               |
|-------------------------------------------------------------------------------------------|-----------------------------------------------------------------------------------------------------|-----------------------------------------------------------------------------------------------------------------|----------|----------|----------------------------------------------------------------|-------------------------------------------------------------------------------------------------------------------------------------------------------------------------------|
| Prospective study (11 teeth in 8 client owned dogs)                                       | -Left maxillary fourth premolar (x2)<br>-Right maxillary canine (x5)<br>-Left maxillary canine (x3) | mm, median 6-mm)<br>-Intrabony pockets present in all cases                                                     |          |          | hemorrhage, or swelling, and the periodontal flaps were healed | depth gain of 5.4mm<br>-Intrabony bony pocket depth decreased in all cases<br>-Intraoral radiographic improvement of alveolar bone height was subjectively noted in all cases |
| Alterman & Huff III, 2016<br><br>Case series (4 teeth in 3 client owned dogs)             | -Right maxillary canine (x1)<br>-Left maxillary canine (x2)<br>-Left mandibular first molar (x1)    | -Stage 2-4 periodontal disease                                                                                  | Periomix | Doxirobe | -Complete healing of all GTR sites                             | -Attachment gain and new bone growth of all GTR sites                                                                                                                         |
| Bebel & Rochette, 2019<br><br>Case report (10 year-old female spayed miniature dachshund) | -Left mandibular canine (lingual aspect)                                                            | -12mm lingual periodontal pocket<br>-3-walled bony pocket on the lingual aspect<br>-Stage 3 periodontal disease | Periomix | Ossiflex | -Surgical site healing                                         | -Periodontal probe measurement 3mm lingually<br>-Radiographic resolution of the infrabony pocket                                                                              |
